# Supplementary material for: Boosting the electrocatalytic activity and stability of Ni/NiO toward the oxygen evolution reaction by coupling FeOOH nanosheets
Source: Royal Society of Chemistry journal article supplement (doi:10.1039/d4nj01114g), 2024-01-01
Supplement: d4nj01114g1.pdf [file d4nj01114g1.pdf]

Boosting the electrocatalytic activity and stability of Ni/NiO toward  
oxygen evolution reaction by coupling FeOOH nanosheets

Yajing Wang, Quanxi Zhu, Peng Zhang, Songli Liu, Jiankang Wang\*

College of Materials Science and Engineering, Yangtze Normal University, Chongqing 408100,  
P.R. China E-mail: wjkwjk074478@163.com

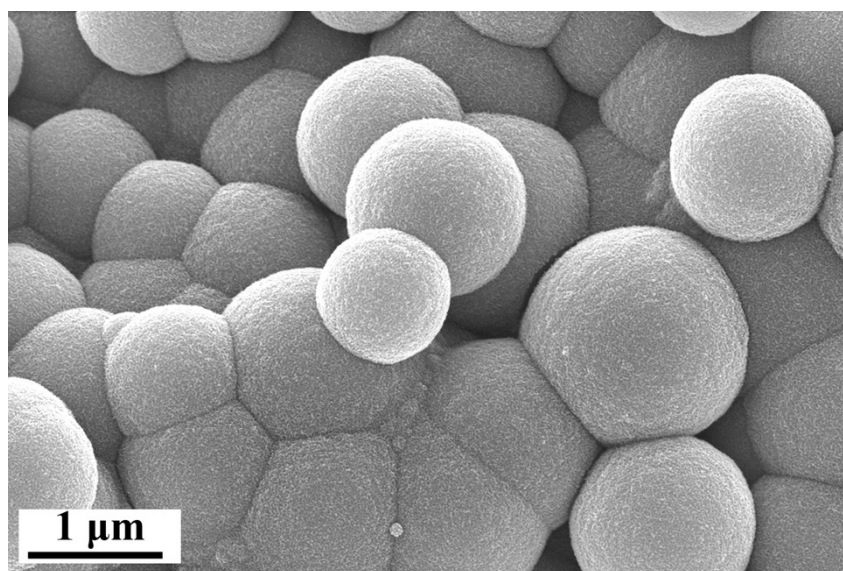

Fig. S1 SEM image of Ni/NiO/TM

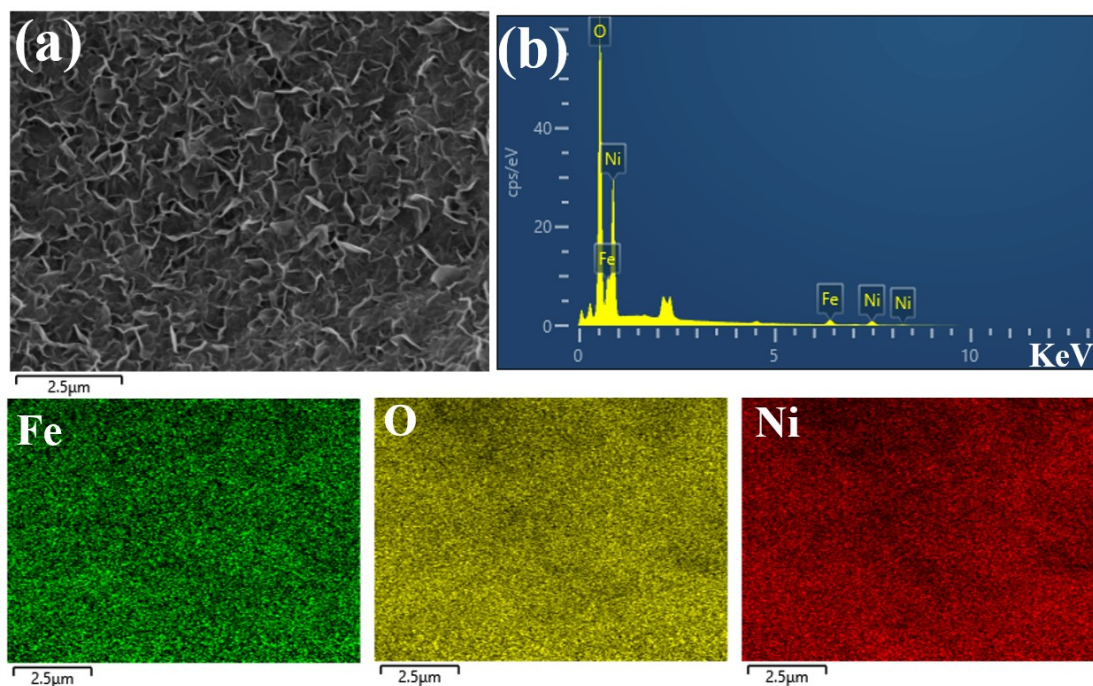

Fig. S2 SEM image (a), SEM-EDS spectra (b) and corresponding elemental mapping including Fe, O and Ni of FeOOH-5/Ni/NiO/TM

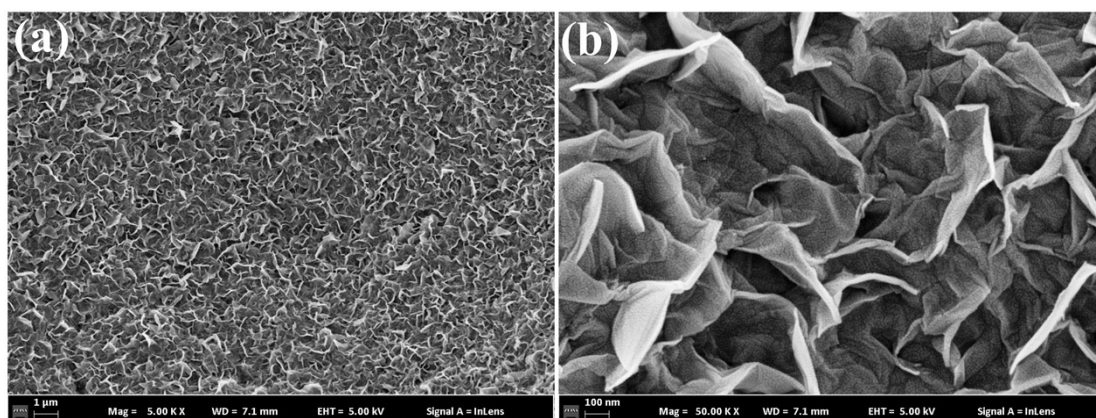

Fig. S3 SEM images of FeOOH-5/Ni/NiO/TM under different magnification.

(a)  $\times 5,000$ ; (b)  $\times 50,000$

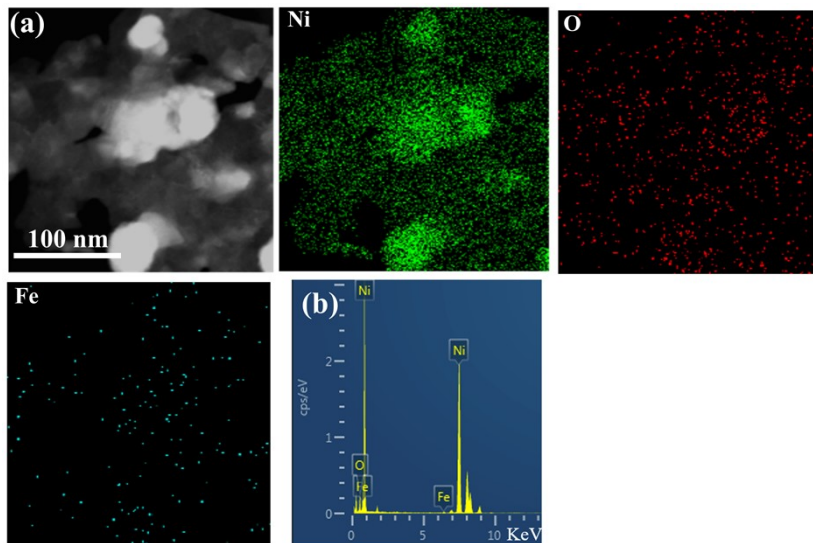

Fig. S4 (a) HAADF-STEM image and corresponding elemental mapping, including Ni, O, Fe; (b) TEM-EDS spectrum

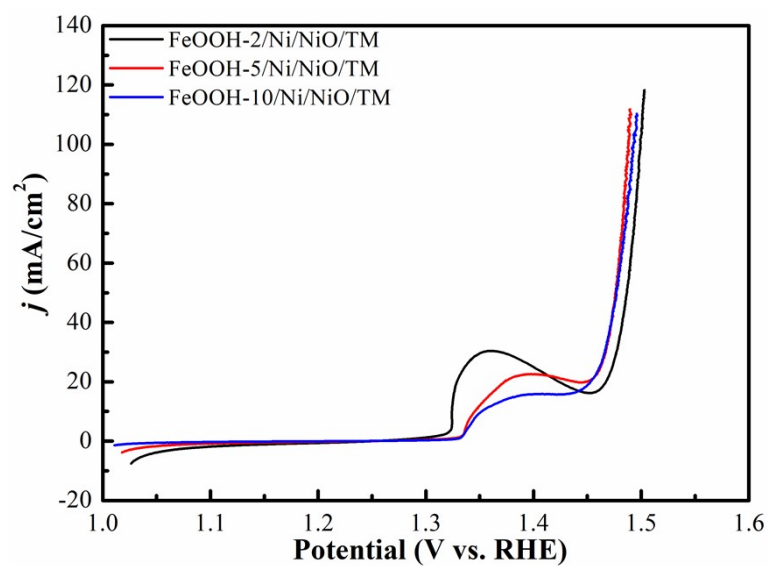

Fig. S5 LSV curves of FeOOH/Ni/NiO/TM samples synthesized under different deposition time

Table S1 OER performance comparison of our catalyst with the previously reported catalysts in 1.0 M KOH

| Catalysts                                    | Tafel slope<br>(mV/dec) | $\eta$ (mV)                  |                       | Refs.                                          |
|----------------------------------------------|-------------------------|------------------------------|-----------------------|------------------------------------------------|
|                                              |                         | 10 mA/cm <sup>2</sup>        | 50 mA/cm <sup>2</sup> |                                                |
| FeOOH-<br>5/Ni/NiO/TM                        | 40.9                    | N/A                          | 246                   | This work                                      |
| CoNi/NC-YS                                   | 53.8                    | 292                          | N/A                   | Appl. Catal. B-Environ.,<br>2022, 315: 121551  |
| Ni/NC-600                                    | 22                      | 336                          | N/A                   | Chem. Eng. J., 2022, 429:<br>132122            |
| Co/N<br>CCPC-3                               | 103                     | 401                          | N/A                   | Nano Energy, 2021, 79:<br>105487               |
| Co/Ce-<br>Ni <sub>3</sub> S <sub>2</sub> /NF | 71.7                    | 286@20<br>mA/cm <sup>2</sup> | ca. 350               | Nano Res., 2020, 13: 2130-<br>2135             |
| CuO@NiCo<br>LDH/CF                           | 91                      | 256@20<br>mA/cm <sup>2</sup> | > 290                 | Inorg. Chem. Front., 2021, 8:<br>3049-3054     |
| NiCo<br>LDH/NF                               | 72                      | 271                          | ca. 370               | Dalton Trans., 2017, 46:<br>8372-8376          |
| NiVO <sub>x</sub> /NF <sub>180</sub>         | 60                      | 220                          | N/A                   | ACS Appl. Energy Mater.,<br>2022, 5: 4318-4328 |
| MOF-<br>Fe/Co(1:2)                           | 52                      | 238                          | 285                   | Angew. Chem. Int. Ed. 2021,<br>60: 12097-12102 |
| FeCo-MOF-<br>EH/NF                           | 42                      | 231                          | > 420                 | Angew. Chem. Int. Ed. 2020,<br>59: 13101-13108 |

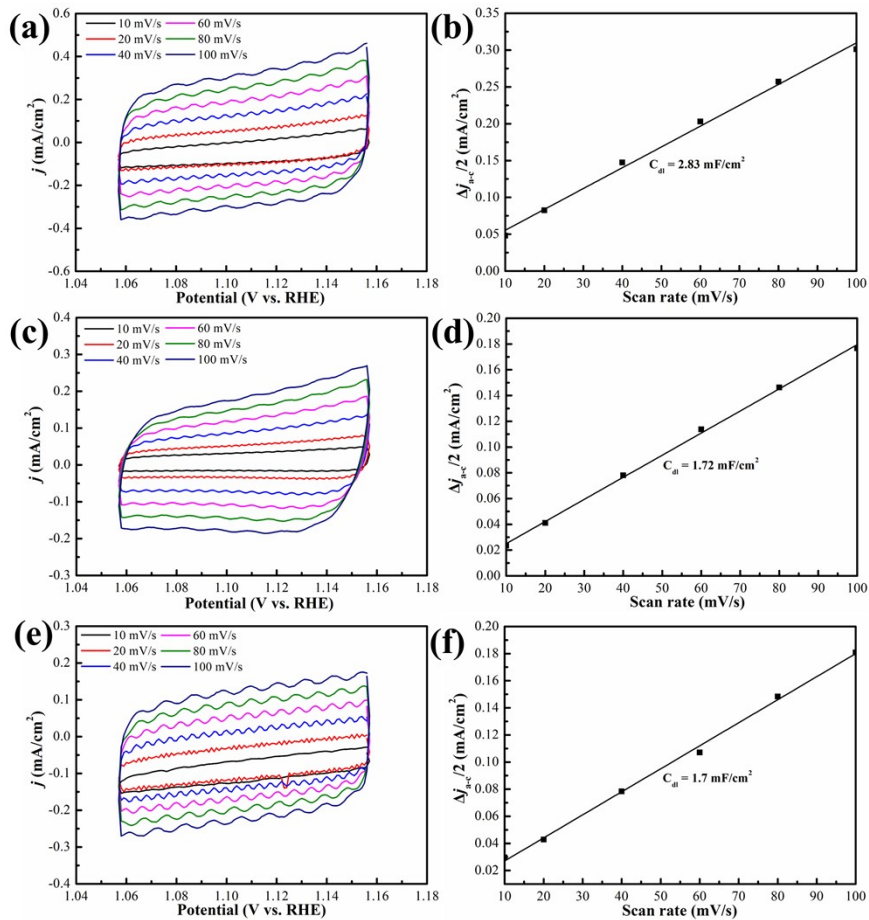

Fig. S6 CV curves under different scan rates and corresponding capacitive current vs. scan rate curves of Ni/NiO/TM (a, b), FeOOH-5/NF (c, d) and FeOOH-5/Ni/NiO/TM (e, f)

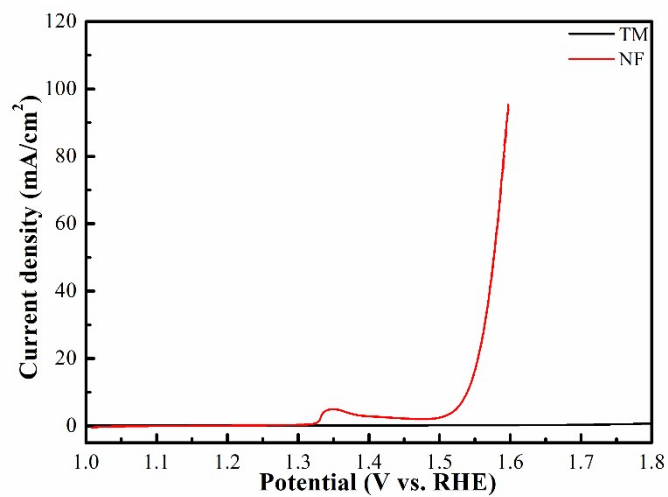

Fig. S7 LSV curves of Ti mesh (TM) and Ni foam (NF)

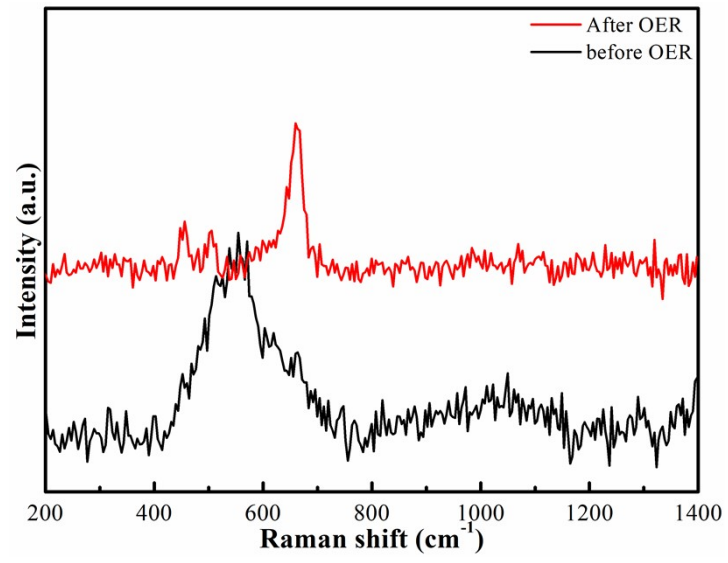

Fig. S8 Raman spectra of FeOOH-5/Ni/NiO/TM before and after OER stability test
